# Supplementary material
Source: PubMed Central journal article supplement (PMC4249180)
Supplement: AEM.02193-14_zam999105808so1.pdf [file AEM.02193-14_zam999105808so1.pdf]

TABLE S1 Primers used in this study

| Primer name   | Sequence 5→3 <sup>a</sup>              | Restriction enzyme site |
|---------------|----------------------------------------|-------------------------|
| RxDAOP1N      | GCAC <u>CATATG</u> AGGGATTGCGGGCGTGC   | NdeI                    |
| RDAOP2N       | AGCAAGCTTGGAGAGCGCGGCCCGGCCAG          | —                       |
| RxDAOp1-2     | AGGAGGTCCAGGATCACGTA                   | —                       |
| RxDAONPCR1    | TACAGGGCGTATCCGGAGGACC                 | —                       |
| RxDAOPR10     | GAGCCACCCGTCGACACGAACGCTCTGATCC        | —                       |
| RxDAO1R23-43p | ACTGTAAAGCGATCCGTATCG                  | —                       |
| RDAS1B15      | CGC <u>GGATCCT</u> TAAGGGTTCCGGTCGAGCG | BamHI                   |

<sup>a</sup> Restriction enzyme site is underlined.

TABLE S2 Summary of purification of recombinant *R. xylanophilus* DAO expressed in *E. coli*

| Step                                  | Total protein (mg) | Total activity (U) | Specific activity (U/mg) | Purification (fold) | Recovery (%) |
|---------------------------------------|--------------------|--------------------|--------------------------|---------------------|--------------|
| Crude extract                         | 1,540              | 96.9               | 0.0629                   | 1                   | 100          |
| Heat treatment at 70°C                | 348                | 124                | 0.356                    | 5.67                | 128          |
| Metal-chelate affinity chromatography | 0.501              | 10.3               | 21.1                     | 336                 | 8.31         |

The enzyme activity was determined by an oxygen electrode method at 60°C using 20 mM D-valine as a substrate. The starting material was 24.5 g of *E. coli* cell paste from a 3 l fermentation.

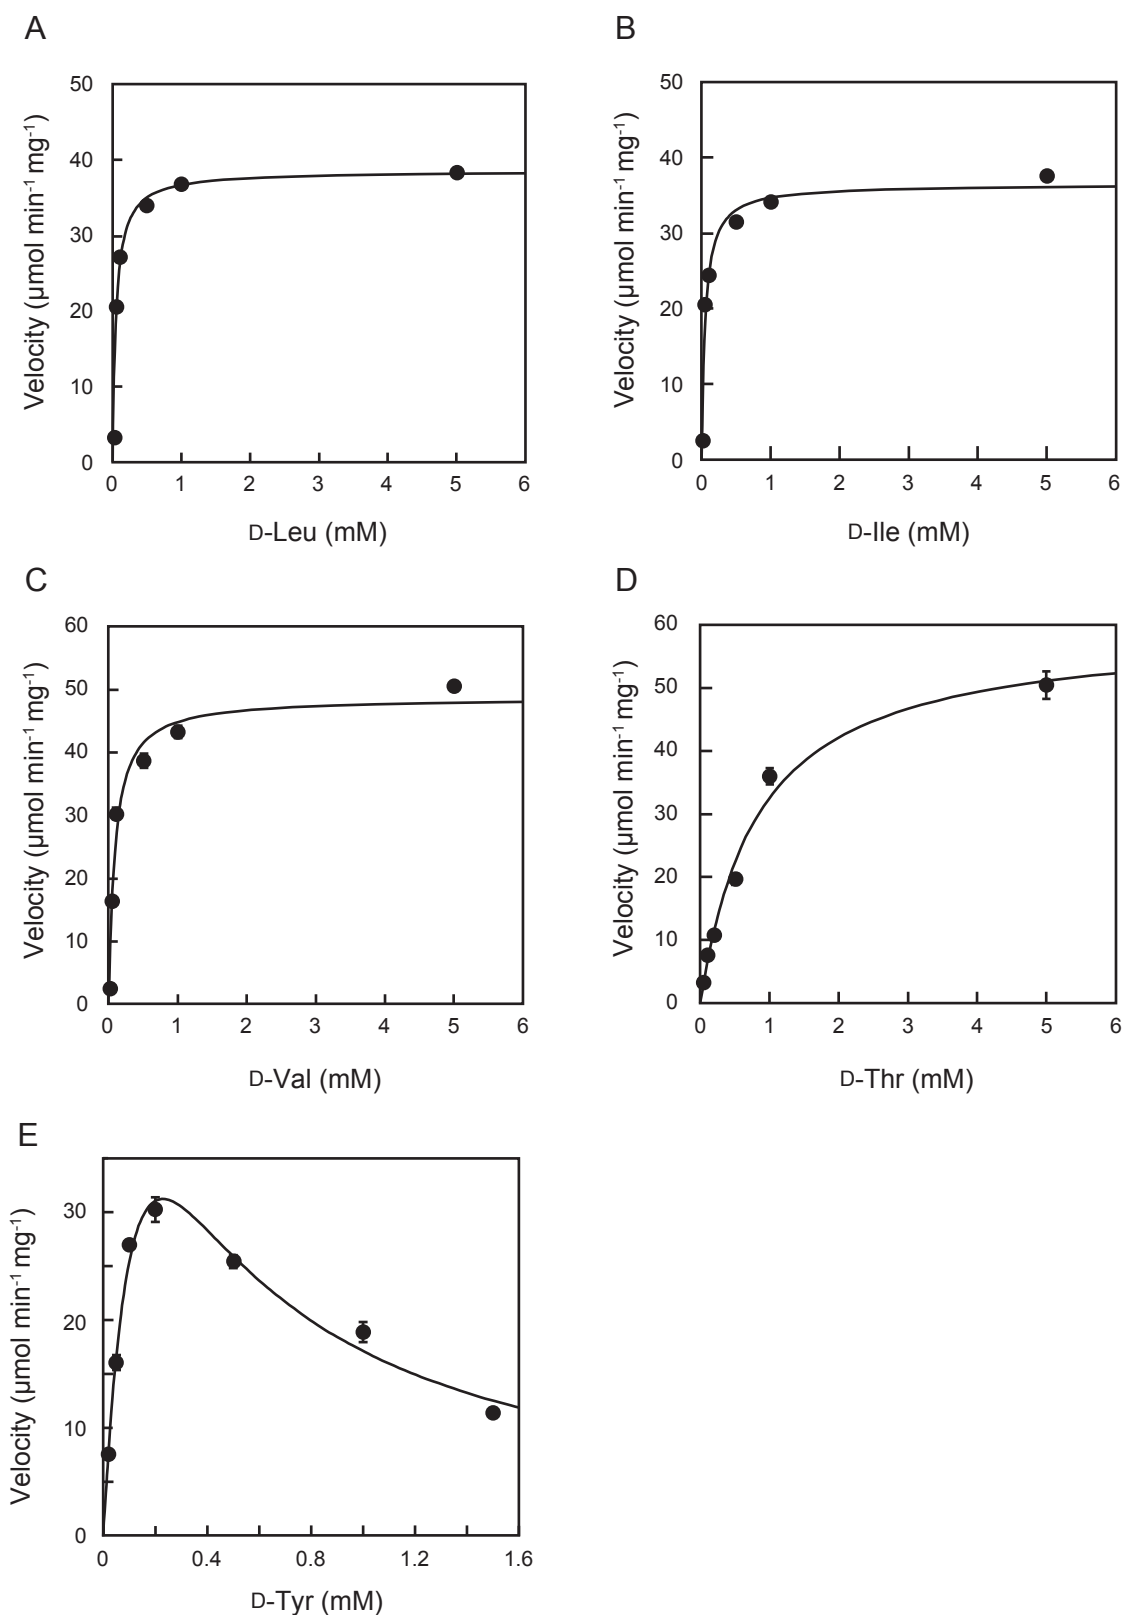

FIG. S1 Kinetic analysis of RxDAO. The kinetic analysis was performed in 50 mM potassium phosphate buffer (pH 8.0) for each D-amino acid at 60° C using a coupled *o*-dianisidine-peroxidase method. The fitting and plotting were performed using the program SigmaPlot 12.5. Each data point represents the mean  $\pm$  SD of three measurements.

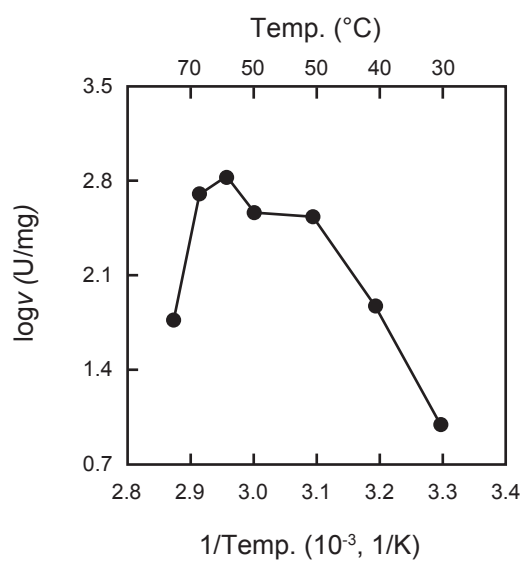

FIG. S2 Arrhenius plot of the temperature dependence of the enzyme reaction rate. This plot was made from the data of Fig. 4B. The activation energy of the reaction was calculated in the temperature range from 30°C to 50°C.
